# Supplementary material for: Causal Transcription Regulatory Network Inference Using Enhancer Activity as a Causal Anchor
Source: PubMed Central journal article supplement (PMC6274755; doi:10.3390/ijms19113609), 2018-11-15
Supplement: ijms-19-03609-s001.pdf [file ijms-19-03609-s001.pdf]

## Precision-Recall for TFs in Knock-out Data

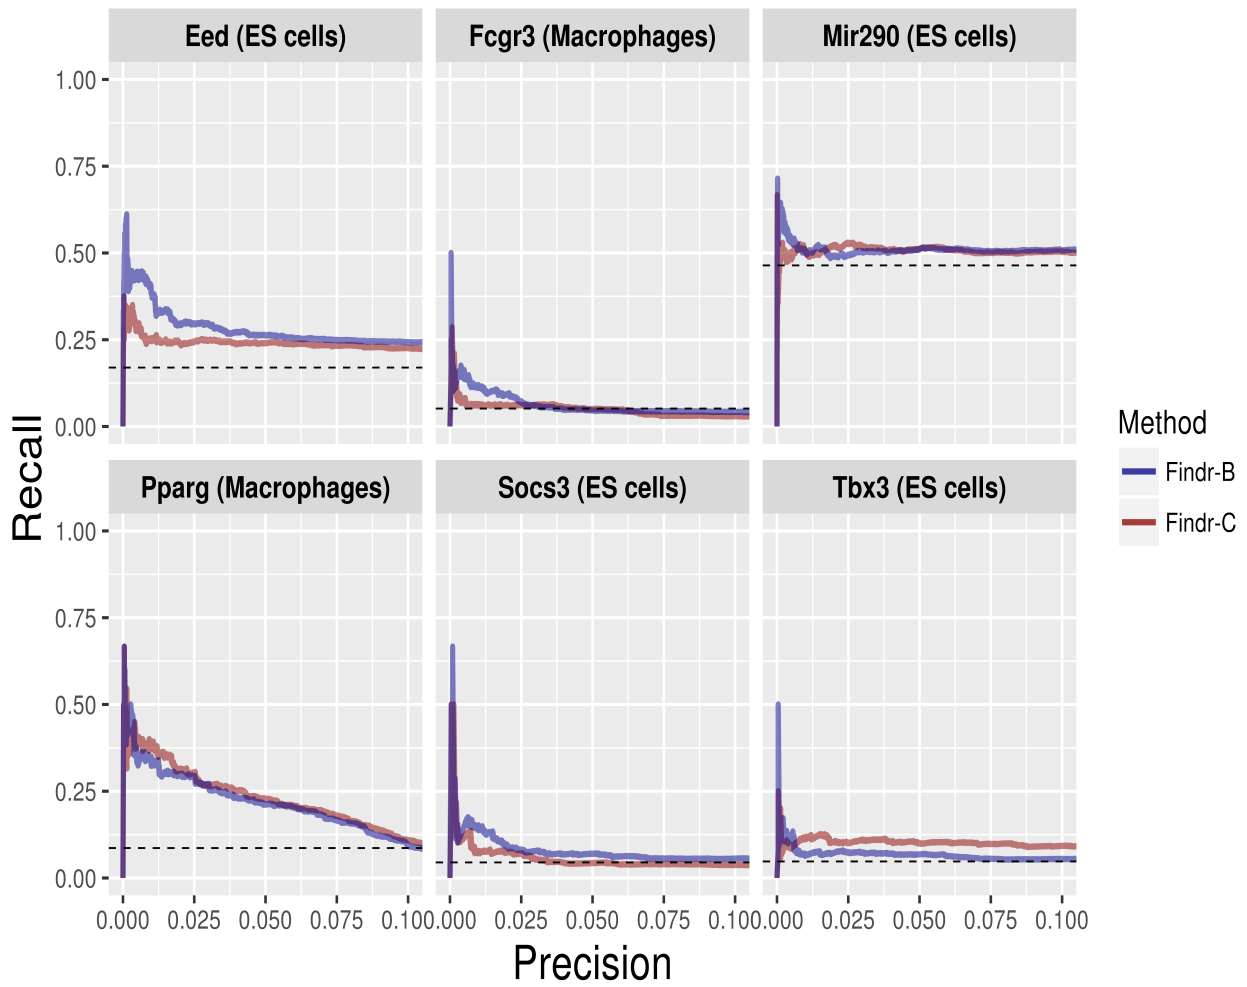

Figure S1: Recall-precision curves for targets predicted by Findr-B and findr-C using perturbation data in ES cells and macrophages. The dotted line represents the background or random precision.

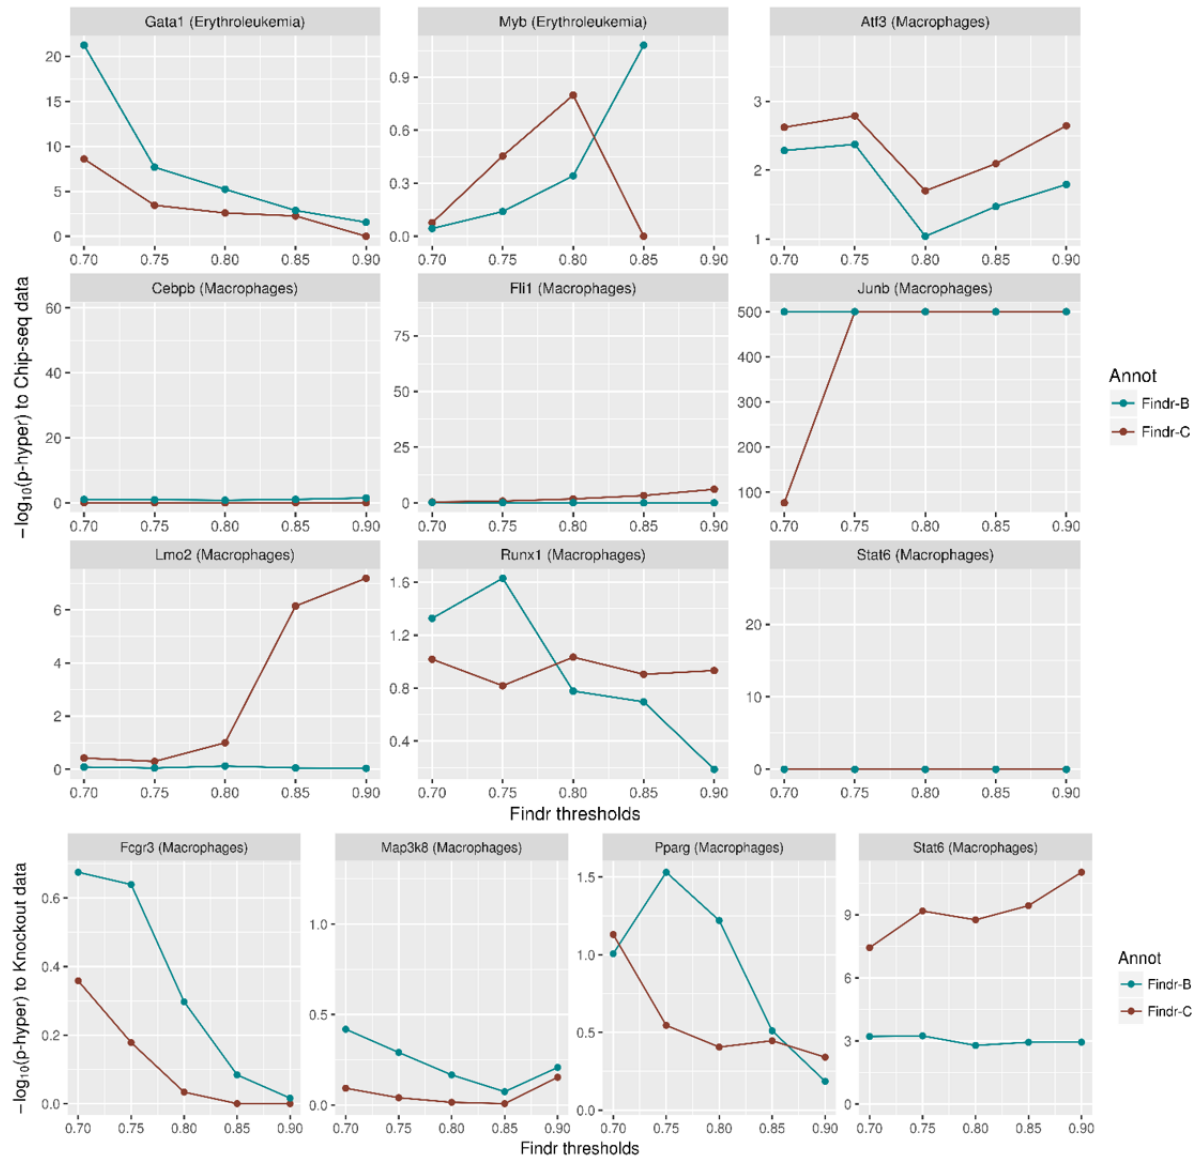

Figure S2: Robustness of Findr performance demonstrated by using different score thresholds in macrophages and erythroleukemia cells

A.

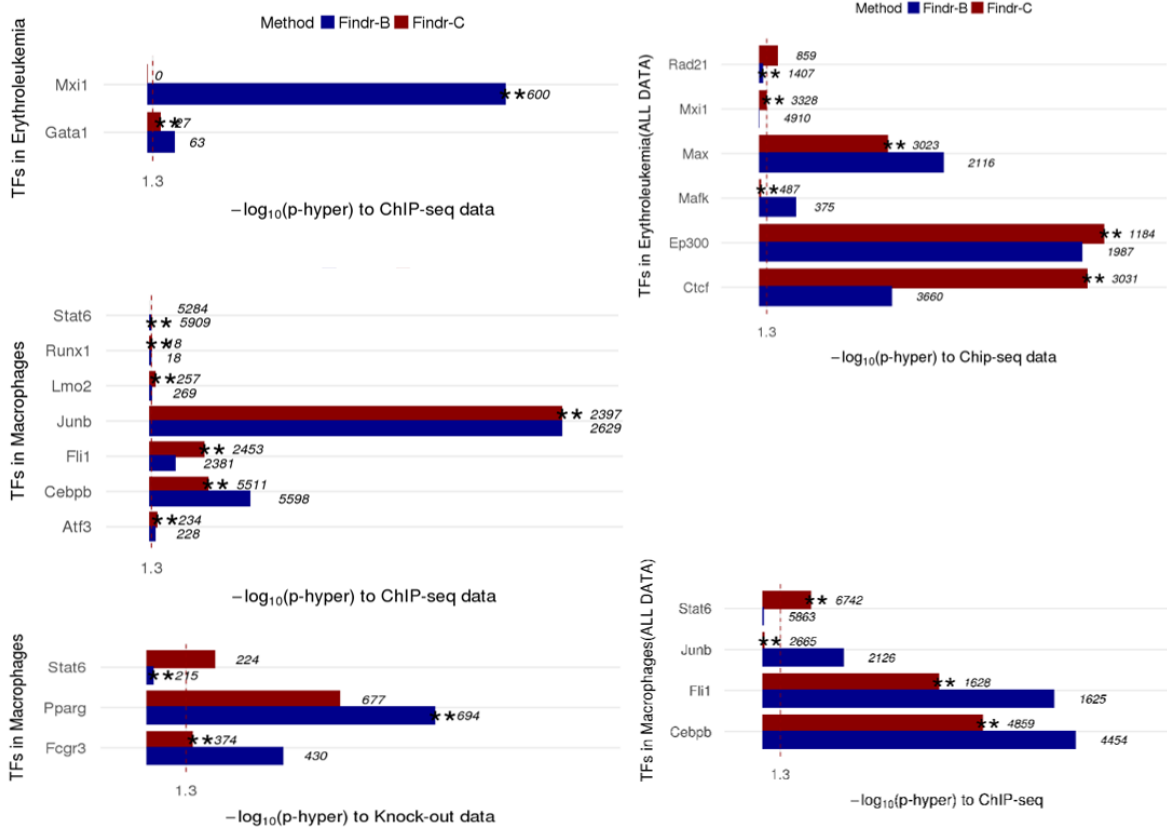

B.

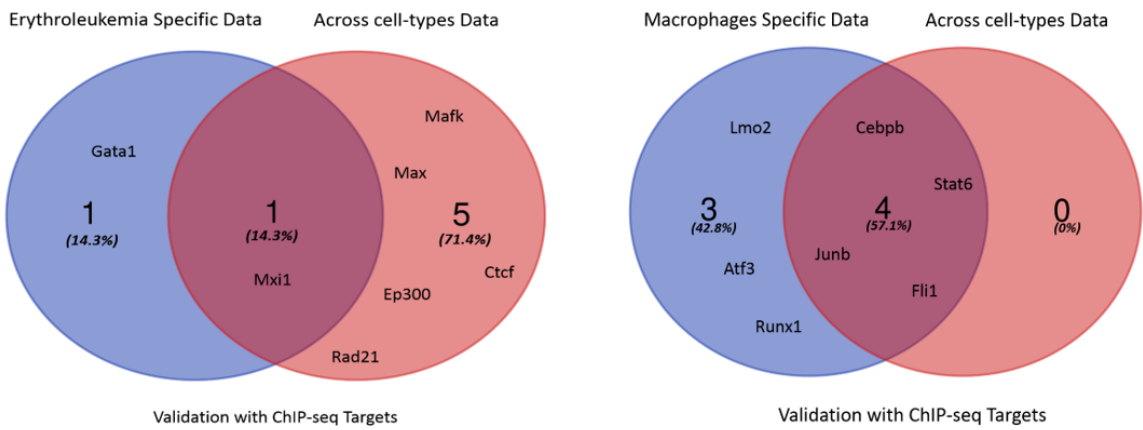

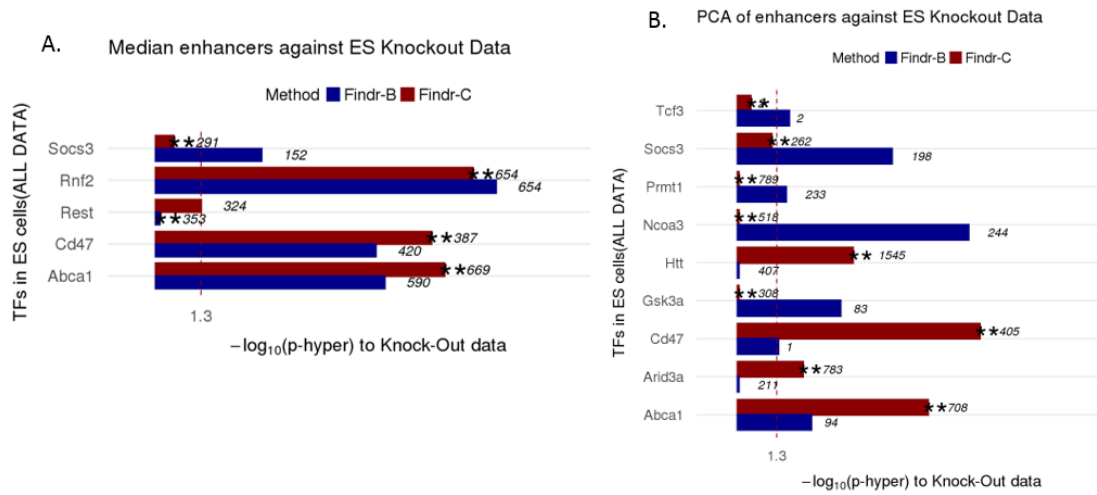

Figure S4: Performance of Findr when taking the median expression levels of enhancers(A) and first PC of enhancer expression (B).



| Index | Name                                                                                      | P-value     | Adjusted p-value | Z-score | Combined score |
|-------|-------------------------------------------------------------------------------------------|-------------|------------------|---------|----------------|
| 1     | positive regulation of transcription from RNA polymerase II promoter                      | 0.000005725 | 0.001048         | -7.62   | 91.98          |
| 2     | lipopolysaccharide-mediated signaling pathway                                             | 1.284e-12   | 9.409e-9         | -2.88   | 78.95          |
| 3     | neutrophil degranulation                                                                  | 5.727e-7    | 0.0003238        | -5.21   | 74.88          |
| 4     | cellular response to lipopolysaccharide                                                   | 8.063e-10   | 0.000002954      | -3.33   | 69.70          |
| 5     | positive regulation of NF-kappaB import into nucleus                                      | 1.948e-8    | 0.00004757       | -3.75   | 66.54          |
| 6     | I-kappaB phosphorylation                                                                  | 7.979e-7    | 0.0003654        | -4.58   | 64.29          |
| 7     | mRNA catabolic process                                                                    | 7.015e-8    | 0.00008565       | -3.48   | 57.26          |
| 8     | positive regulation of NF-kappaB transcription factor activity by ER overload response    | 3.155e-8    | 0.00005778       | -3.29   | 56.78          |
| 9     | negative regulation of cysteine-type endopeptidase activity involved in apoptotic process | 0.00001126  | 0.001594         | -4.70   | 53.52          |
| 10    | positive regulation of I-kappaB phosphorylation                                           | 0.000001792 | 0.0005251        | -4.03   | 53.34          |

Table s1: GO enrichment (biological process) for 1119 predicted JUNB targets in mouse macrophages

Table s2: GO enrichment (molecular function) for 1119 predicted JUNB targets in mouse macrophages

| Index | Name                                     | P-value   | Adjusted p-value | Z-score | Combined score |
|-------|------------------------------------------|-----------|------------------|---------|----------------|
| 1     | telomerase RNA binding                   | 1.748e-10 | 3.491e-8         | -3.83   | 85.96          |
| 2     | mRNA binding                             | 3.160e-10 | 3.491e-8         | -3.85   | 84.17          |
| 3     | miRNA binding                            | 3.165e-10 | 3.491e-8         | -3.78   | 82.64          |
| 4     | translation factor activity, RNA binding | 4.525e-10 | 3.491e-8         | -3.82   | 82.19          |
| 5     | single-stranded RNA binding              | 6.124e-10 | 3.491e-8         | -3.68   | 78.06          |
| 6     | GU repeat RNA binding                    | 5.145e-10 | 3.491e-8         | -3.64   | 77.89          |
| 7     | alpha-aminoacyl-tRNA binding             | 5.145e-10 | 3.491e-8         | -3.64   | 77.77          |
| 8     | 21U-RNA binding                          | 5.145e-10 | 3.491e-8         | -3.63   | 77.58          |

| <b>Index</b> | <b>Name</b>                                                                                                                                                                          | <b>P-value</b> | <b>Adjusted p-value</b> | <b>Z-score</b> | <b>Combined score</b> |
|--------------|--------------------------------------------------------------------------------------------------------------------------------------------------------------------------------------|----------------|-------------------------|----------------|-----------------------|
| 1            | positive regulation of transcription from RNA polymerase II promoter                                                                                                                 | 4.367e-16      | 1.231e-12               | -7.77          | 274.82                |
| 2            | negative regulation of transcription from RNA polymerase II promoter                                                                                                                 | 2.103e-13      | 2.963e-10               | -7.23          | 210.97                |
| 3            | positive regulation of transcription, DNA-templated                                                                                                                                  | 5.636e-11      | 8.672e-9                | -7.21          | 170.24                |
| 4            | positive regulation of transcription from RNA polymerase II promoter involved in neuron differentiation                                                                              | 2.951e-11      | 6.827e-9                | -6.74          | 163.44                |
| 5            | positive regulation of ethanol catabolic process by positive regulation of transcription from RNA polymerase II promoter                                                             | 2.793e-10      | 1.306e-8                | -6.43          | 141.37                |
| 6            | positive regulation of termination of RNA polymerase II transcription                                                                                                                | 2.793e-10      | 1.306e-8                | -6.43          | 141.36                |
| 7            | positive regulation of transcription from RNA polymerase II promoter involved in meiotic cell cycle                                                                                  | 2.793e-10      | 1.306e-8                | -6.41          | 141.08                |
| 8            | positive regulation of mating type switching by positive regulation of transcription from RNA polymerase II promoter                                                                 | 2.793e-10      | 1.306e-8                | -6.41          | 141.03                |
| 9            | positive regulation of filamentous growth of a population of unicellular organisms in response to starvation by positive regulation of transcription from RNA polymerase II promoter | 2.793e-10      | 1.306e-8                | -6.41          | 140.97                |
| 10           | positive regulation of transcription from RNA polymerase II promoter by calcium-mediated signaling                                                                                   | 2.793e-10      | 1.306e-8                | -6.40          | 140.88                |
| <b>Index</b> | <b>Name</b>                                                                                                                                                                          | <b>P-value</b> | <b>Adjusted p-value</b> | <b>Z-score</b> | <b>Combined score</b> |
| 9            | ribonuclease P RNA binding                                                                                                                                                           | 5.145e-10      | 3.491e-8                | -3.62          | 77.48                 |
| 10           | 7S RNA binding                                                                                                                                                                       | 5.413e-10      | 3.491e-8                | -3.63          | 77.47                 |

Table S3: GO enrichment (biological process) for 131 predicted CBX7 targets in mouse ES cells

Table S4: GO enrichment (biological process) for top 131 CBX7 bound genes (ChIP-seq, GEO accession number GSM1041373) in mouse ES cells

| Index | Name                                                                                                                                  | P-value     | Adjusted p-value | Z-score | Combined score |
|-------|---------------------------------------------------------------------------------------------------------------------------------------|-------------|------------------|---------|----------------|
| 1     | positive regulation of transcription from RNA polymerase II promoter                                                                  | 8.875e-9    | 0.000009860      | -7.77   | 143.99         |
| 2     | negative regulation of transcription from RNA polymerase II promoter                                                                  | 5.496e-9    | 0.000009860      | -7.23   | 137.53         |
| 3     | positive regulation of DNA repair by positive regulation of transcription from RNA polymerase II promoter                             | 3.510e-7    | 0.00003696       | -6.62   | 98.33          |
| 4     | positive regulation of transcription from RNA polymerase II promoter involved in neuron differentiation                               | 6.530e-7    | 0.00003696       | -6.68   | 95.11          |
| 5     | regulation of cellular ketone metabolic process by positive regulation of transcription from RNA polymerase II promoter               | 0.000001100 | 0.00003696       | -6.41   | 87.92          |
| 6     | positive regulation of snRNA transcription from RNA polymerase II promoter                                                            | 0.000001100 | 0.00003696       | -6.40   | 87.86          |
| 7     | positive regulation of pseudohyphal growth by positive regulation of transcription from RNA polymerase II promoter                    | 0.000001100 | 0.00003696       | -6.40   | 87.85          |
| 8     | positive regulation of purine nucleotide biosynthetic process by positive regulation of transcription from RNA polymerase II promoter | 0.000001100 | 0.00003696       | -6.40   | 87.84          |
| 9     | positive regulation of starch catabolic process by positive regulation of transcription from RNA polymerase II promoter               | 0.000001100 | 0.00003696       | -6.39   | 87.67          |
| 10    | positive regulation of ribosomal protein gene transcription from RNA polymerase II promoter                                           | 0.000001100 | 0.00003696       | -6.39   | 87.66          |
